# Supplementary material for: Effects of storage temperatures on the starch digestibility of whole rice with distinct starch fine molecular structure
Source: Royal Society of Chemistry journal article supplement (doi:10.1039/d2fo03737h), 2023-01-01
Supplement: d2fo03737h1.pdf [file d2fo03737h1.pdf]

1 **Effects of storage temperatures on the starch digestibility of**

2 **whole rice with distinct starch fine molecular structure**

3

4

5

6

7

8

9

10

11

12

13

14

15

16

17

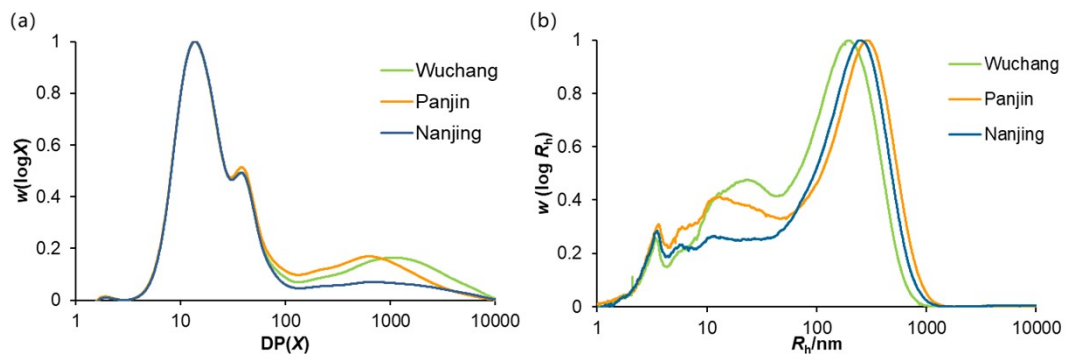

18

19 Figure S1. SEC chain-length distributions (a) and weight distributions (b) of the whole  
 20 starch molecules for 3 different rice samples. All distributions were normalized to the  
 21 peak maxima. Data is collected from the literature with permission.<sup>1</sup>

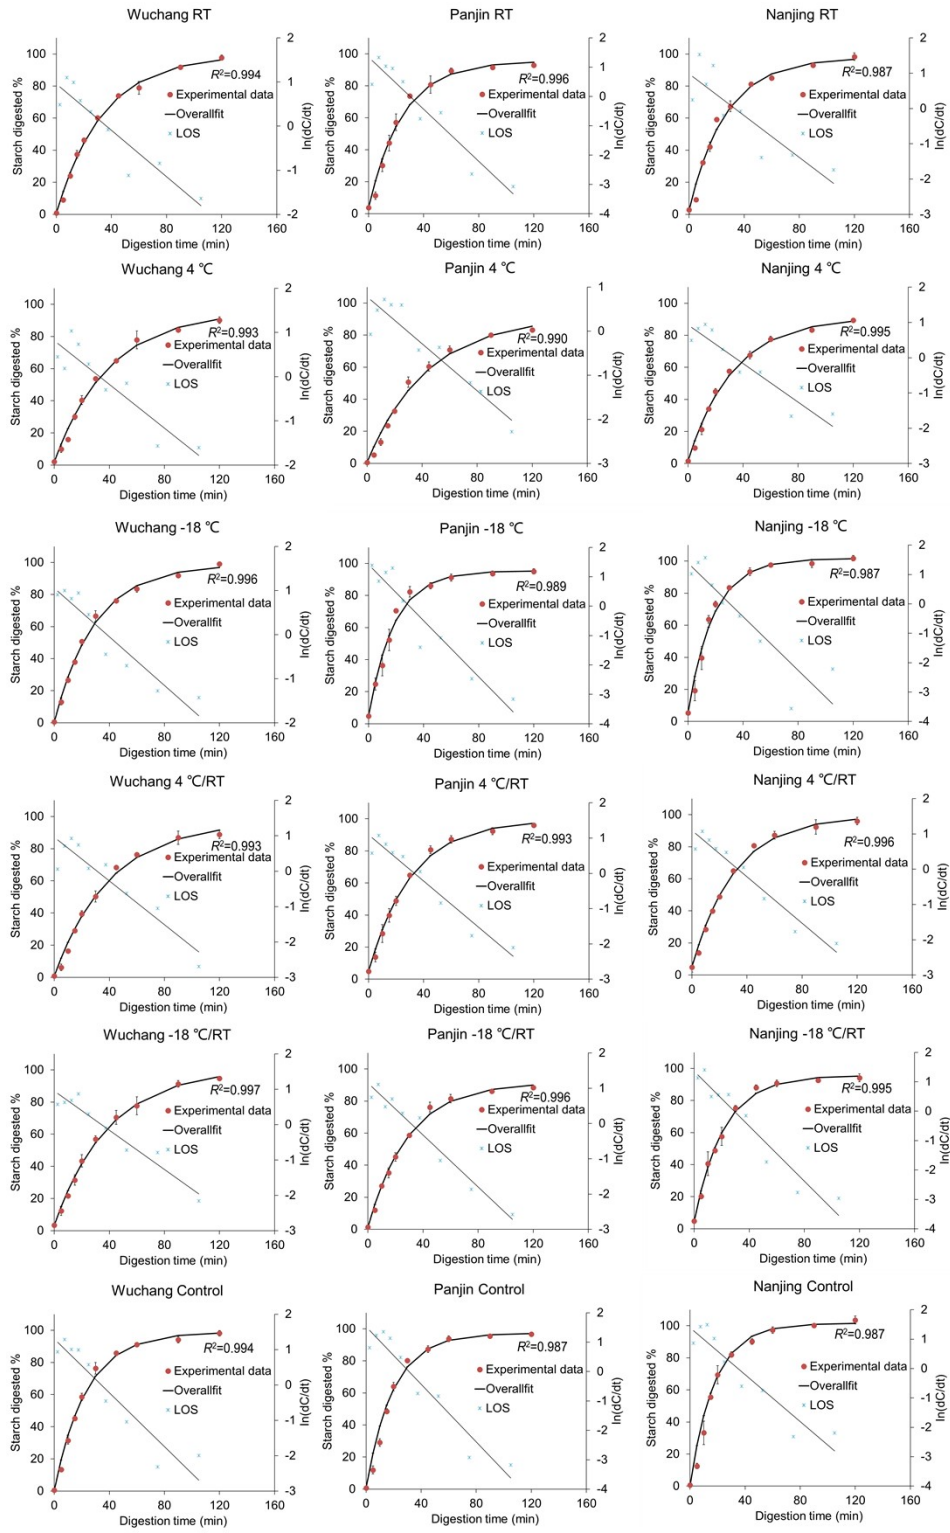

22

23 Figure S2. LOS plots and first-order kinetics fittings for cooked rice stored at different  
 24 temperatures. The overall fit is the first-order kinetics fitting, which is corresponding  
 25 to the primary Y axis. LOS plots are indicated by blue asterisks, which are

26 corresponding to the secondary Y axis. The experimental values shown are mean  $\pm$  SD.

27

28 Table S1. Structural parameters for starch chain-length distributions and molecule size

29 distributions of three rice varieties.<sup>1</sup>

|                                        |                          | Wuchang            | Panjin             | Nanjing           |
|----------------------------------------|--------------------------|--------------------|--------------------|-------------------|
| AC (%)                                 |                          | 27.98 $\pm$ 0.76de | 26.27 $\pm$ 0.18cd | 16.47 $\pm$ 1.62a |
|                                        | $h_{Am,i}/10^{-2}$       | 12.44 $\pm$ 1.40a  | 20.92 $\pm$ 1.63a  | 34.27 $\pm$ 5.1b  |
|                                        | $h_{Am,ii}/10^{-2}$      | 38.04 $\pm$ 1.35a  | 49.36 $\pm$ 4.23b  | 38.70 $\pm$ 3.26a |
| Amylose chain-length distributions     | $h_{Am,iii}/10^{-2}$     | 62.27 $\pm$ 0.91b  | 47.47 $\pm$ 5.48a  | 66.21 $\pm$ 7.74b |
|                                        | $\beta_{Am,i}/10^{-3}$   | 7.94 $\pm$ 0.03a   | 14.56 $\pm$ 1.93b  | 12.80 $\pm$ 0.27b |
|                                        | $\beta_{Am,ii}/10^{-3}$  | 2.41 $\pm$ 0.01a   | 3.23 $\pm$ 0.05b   | 3.70 $\pm$ 0.14c  |
|                                        | $\beta_{Am,iii}/10^{-3}$ | 0.83 $\pm$ 0.01a   | 1.15 $\pm$ 0.05c   | 0.96 $\pm$ 0.06b  |
|                                        | $h_{Ap,i}/10^{-2}$       | 97.11 $\pm$ 0.00b  | 98.17 $\pm$ 0.14c  | 95.69 $\pm$ 0.06a |
|                                        | $h_{Ap,iii}/10^{-2}$     | 8.91 $\pm$ 0.00b   | 9.38 $\pm$ 0.05ab  | 7.65 $\pm$ 0.66a  |
|                                        | $h_{Ap,v}/10^{-2}$       | 0.74 $\pm$ 0.00a   | 0.75 $\pm$ 0.02a   | 0.40 $\pm$ 0.12a  |
| Amylopectin chain-length distributions | $\beta_{Ap,i}/10^{-2}$   | 10.58 $\pm$ 0.17a  | 10.47 $\pm$ 0.06a  | 10.77 $\pm$ 0.25a |
|                                        | $\beta_{Ap,ii}/10^{-2}$  | 4.80 $\pm$ 0.09b   | 3.73 $\pm$ 0.10a   | 3.71 $\pm$ 0.05a  |
|                                        | $\beta_{Ap,iii}/10^{-2}$ | 5.73 $\pm$ 0.04a   | 6.05 $\pm$ 0.03ab  | 6.56 $\pm$ 0.35b  |
|                                        | $\beta_{Ap,iv}/10^{-2}$  | 2.80 $\pm$ 0.08a   | 3.66 $\pm$ 0.14b   | 4.33 $\pm$ 0.35b  |
|                                        | $\beta_{Ap,v}/10^{-2}$   | 3.29 $\pm$ 0.36a   | 4.69 $\pm$ 0.33b   | 5.89 $\pm$ 0.19c  |
|                                        | $\beta_{Ap,vi}/10^{-2}$  | 5.45 $\pm$ 0.24c   | 1.73 $\pm$ 0.20a   | 2.46 $\pm$ 0.24b  |
|                                        | $R_hAM_{peak}$           | 17.1 $\pm$ 3.3a    | 13.7 $\pm$ 0.8a    | 11.0 $\pm$ 1.0a   |
| Molecule size distributions            | $R_hAP_{peak}$           | 200.2 $\pm$ 1.3a   | 283.3 $\pm$ 8.1c   | 255.7 $\pm$ 6.1b  |
|                                        | $R_h,AM$                 | 18.4 $\pm$ 2.0a    | 21.4 $\pm$ 0.3a    | 17.6 $\pm$ 0.2a   |
|                                        | $R_h,AP$                 | 205.8 $\pm$ 0.1a   | 268.9 $\pm$ 8.6c   | 239.9 $\pm$ 1.2b  |
|                                        | $R_h$                    | 137.8 $\pm$ 9.6a   | 190.8 $\pm$ 6.2b   | 193.5 $\pm$ 0.7b  |

30 Note: The values are presented as mean  $\pm$  SD. Different letters in the same rows

31 are significantly different at  $p < 0.05$ . AC is amylose content. Data is collected from the

32 literature with permission.<sup>1</sup>

34 References

- 35 1. X. Yi, E. Li, S. Yu, X. Zhang, C. Yang, S. Shao, R. G. Gilbert and C. Li, Combined  
36 effects of starch fine molecular structures and water content on starch digestibility of  
37 cooked white rice, *Int J Biol Macromol*, 2022, **215**, 192-202.  
38
